# Supplementary material
Source: publisher figshare collection journal article supplement (https://gsajournals.figshare.com/ndownloader/files/23777576)
Supplement: Supplementary file 1 [file 23777576]

## Sheet: Sheet1
Table S3.	SNP counts in vegetative lines of S/R hybrids
			Total SNP distribution
		Line	Parent SNP	S288c fixed	Heterozygous	RM11 fixed
		S/R_1	41162	3070	38059	33
		S/R_2	41162	491	40136	535
		S/R_3	41162	562	40217	383
		S/R_4	41162	456	40494	212
		S/R_5	41162	195	40938	29
		S/R_6	41162	410	39787	965
		S/R_7	41162	158	37120	3884
		S/R_8	41162	223	39650	1289
		S/R_9	41162	3073	37217	872
		S/R_10	41162	788	40165	209
	S288c fixed (2:0) SNPs
		chr	S/R_1	S/R_2	S/R_3	S/R_4	S/R_5	S/R_6	S/R_7	S/R_8	S/R_9	S/R_10	genotype
		1	13	26	38	13	89	10	11	5	41	16	0
		2	3	52	37	2	1	7	10	80	110	17	0
		3	2	3	10	1	0	0	1	7	17	19	0
		4	5	35	56	34	1	21	8	14	102	18	0
		5	6	13	26	15	4	4	2	2	37	513	0
		6	3	22	19	1	13	6	8	6	146	15	0
		7	21	62	43	7	8	15	69	15	150	33	0
		8	12	16	32	3	4	70	6	0	54	16	0
		9	6	27	17	4	22	11	1	7	61	17	0
		10	6	25	23	1	5	5	3	30	1827	9	0
		11	3	43	52	10	6	195	3	6	80	14	0
		12	2963	60	80	9	12	32	1	9	134	30	0
		13	8	28	35	1	18	8	9	5	78	18	0
		14	2	10	23	3	3	14	7	10	56	5	0
		15	16	43	54	7	7	9	18	10	121	42	0
		16	1	26	17	345	2	3	1	17	59	6	0
	Heterozygous (1:1) SNPs
		chr	S/R_1	S/R_2	S/R_3	S/R_4	S/R_5	S/R_6	S/R_7	S/R_8	S/R_9	S/R_10	genotype
		1	938	921	904	937	851	940	940	945	894	933	0.5
		2	3681	3611	3615	3680	3684	3674	3675	3509	3505	3598	0.5
		3	579	336	568	580	581	577	580	574	554	560	0.5
		4	3949	3897	3874	3924	3952	3930	3817	3934	3684	3933	0.5
		5	1811	1793	1777	1804	1814	1317	1789	1817	1732	1303	0.5
		6	1359	1338	1337	1365	1353	1191	1357	1345	1200	1350	0.5
		7	3748	3678	3702	3767	3767	3531	3704	3760	3563	3730	0.5
		8	1583	1562	1548	1591	1591	1521	1590	1593	1515	1575	0.5
		9	1993	1953	1963	1995	1975	1985	1997	1986	1892	1978	0.5
		10	2854	2823	2772	2807	2856	2849	2858	2830	1017	2847	0.5
		11	3131	3068	3063	3124	3128	2934	3129	2333	3005	3108	0.5
		12	1311	4174	4166	4264	4262	4234	661	4261	4058	4238	0.5
		13	2878	2833	2804	2855	2871	2877	2878	2882	2772	2861	0.5
		14	1911	1896	1884	1913	1912	1901	1910	1905	1828	1862	0.5
		15	4390	4344	4319	4293	4398	4389	4291	4384	4146	4352	0.5
		16	1943	1909	1921	1595	1943	1937	1944	1592	1852	1937	0.5
	RM11 fixed (0:2) SNPs
		chr	S/R_1	S/R_2	S/R_3	S/R_4	S/R_5	S/R_6	S/R_7	S/R_8	S/R_9	S/R_10	genotype
		1	0	4	9	1	11	1	0	1	16	2	1
		2	2	23	34	4	1	5	1	97	71	71	1
		3	0	242	3	0	0	4	0	0	10	2	1
		4	4	26	28	0	5	7	133	10	172	7	1
		5	2	13	16	0	1	498	28	0	50	3	1
		6	4	6	10	0	0	169	1	15	20	1	1
		7	7	36	31	2	1	230	3	1	63	13	1
		8	1	18	16	2	1	5	0	3	27	5	1
		9	0	19	19	0	2	3	1	6	46	4	1
		10	1	13	66	53	0	7	0	1	17	5	1
		11	1	24	20	1	1	6	3	796	50	13	1
		12	1	41	29	2	1	9	3613	5	83	7	1
		13	3	28	50	33	0	4	2	2	39	10	1
		14	4	11	10	1	2	2	0	2	33	50	1
		15	2	21	35	108	3	10	99	14	141	14	1
		16	1	10	7	5	0	5	0	336	34	2	1
